# Supplementary material
Source: PubMed Central journal article supplement (PMC7262788)
Supplement: NEJMoa2007764_data-sharing.pdf [file NEJMoa2007764_data-sharing.pdf]

## Data Sharing Statement

Beigel JH, Tomashek KM, Dodd LE, et al. Remdesivir for the Treatment of Covid-19 — Final Report. N Engl J Med. DOI: 10.1056/NEJMoa2007764.

| Question                                                            | Authors' Response                                                                               |
|---------------------------------------------------------------------|-------------------------------------------------------------------------------------------------|
| Will the data collected for your study be made available to others? | Yes                                                                                             |
| Would you like to offer context for your decision?                  | —                                                                                               |
| Which data?                                                         | Complete de-identified patient data set                                                         |
| Additional information about data                                   | —                                                                                               |
| How or where can the data be obtained?                              | <a href="https://accessclinicaldata.niaid.nih.gov">https://accessclinicaldata.niaid.nih.gov</a> |
| When will data availability begin?                                  | After finalization of clinical study report                                                     |
| When will data availability end?                                    | —                                                                                               |
| Will any supporting documents be available?                         | —                                                                                               |
| Which supporting documents?                                         | —                                                                                               |
| Additional information about supporting documents                   | —                                                                                               |
| How or where can supporting documents be obtained?                  | —                                                                                               |
| When will supporting documents availability begin?                  | —                                                                                               |
| When will supporting documents availability end?                    | —                                                                                               |
| To whom will data be available?                                     | —                                                                                               |
| For what type of analysis or purpose?                               | —                                                                                               |
| By what mechanism?                                                  | —                                                                                               |
| Any other restrictions?                                             | —                                                                                               |
| Additional information                                              | —                                                                                               |

This statement was posted on October 8, 2020, at NEJM.org.
